# Supplementary material for: A Comparative Kidney Transcriptome Analysis of Bicarbonate-Loaded insrr-Null Mice
Source: MDPI journal article supplement (doi:10.3390/cimb45120606), 2023-12-04
Supplement: s1 [file s1]

| gene       | Log2FoldChange<br>(KO_H2O/WT_H2O) | Log2FoldChange<br>(KO_NaHCO3/WT_NaHCO3) |
|------------|-----------------------------------|-----------------------------------------|
| Mir6236    | -2,058263123                      | -2,280591659                            |
| Rny3       | 2,25686535                        | 1,909055933                             |
| Rps3a1     | -3,02495289                       | -1,366796218                            |
| Rps7       | -1,585694279                      | -1,773288062                            |
| Gapdh      | -1,52576309                       | -1,702721473                            |
| Rpl35      | 1,784358459                       | 1,429682524                             |
| Nme2       | -1,579963859                      | -1,548887504                            |
| AC161763.1 | 1,496358239                       | 1,614889571                             |
| mt-Nd6     | 1,471731788                       | 1,641139945                             |
| Gm13341    | 1,646292464                       | 1,463259657                             |
| Gm22009    | 1,639439892                       | 1,412646109                             |
| n-R5-8s1   | 1,831231015                       | 1,228719213                             |
| Atn1       | 1,520501347                       | 1,370618284                             |
| Gm4076     | 1,363485504                       | 1,419551667                             |
| S100a11    | 1,322800524                       | 1,364729957                             |
| Pet100     | 1,35556447                        | 1,308720198                             |
| mt-Nd4     | 1,331661344                       | 1,325597518                             |
| Rpl38      | -1,145617672                      | -1,499381338                            |
| Fgg        | -1,430195634                      | -1,17688189                             |
| mt-Nd2     | 1,247125958                       | 1,24262486                              |
| Rpl29      | 1,376983997                       | 1,121918675                             |
| Atpif1     | 1,25140621                        | 1,166675352                             |
| Tnfsf12    | 1,087786667                       | 1,330118092                             |
| Scarna2    | 1,292893926                       | 1,047653949                             |
| Dynlt1b    | -1,222251263                      | -1,105330061                            |

**Supplementary table S1.** Top 25 DEGs which changes expression in mouse kidney after *insrr* knockout.
