# Supplementary material for: A Comparative Kidney Transcriptome Analysis of Bicarbonate-Loaded insrr-Null Mice
Source: MDPI journal article supplement (doi:10.3390/cimb45120606), 2023-12-04
Supplement: s1 [file s1]

| gene     | Log2FoldChange<br>(WT_NaHCO3/WT_H2O) | Log2FoldChange<br>(KO_NaHCO3/KO_H2O) |
|----------|--------------------------------------|--------------------------------------|
| Cptp     | 0,631934                             | -0,16362                             |
| Nr4a1    | 0,558604                             | -0,19521                             |
| Lpar2    | 0,515627                             | -0,1642                              |
| Rcan1    | 0,503813                             | -0,1184                              |
| Arrdc2   | 0,489157                             | -0,08081                             |
| Kcnk5    | 0,417398                             | -0,08932                             |
| Slc52a3  | 0,277623                             | -0,34148                             |
| Gsr      | 0,273031                             | -0,2831                              |
| Slc22a12 | 0,199252                             | -0,29684                             |
| Cbr3     | 0,187706                             | -0,40673                             |
| Atp5k    | 0,18106                              | -0,2838                              |
| Atp6v1g3 | 0,17637                              | -0,37808                             |
| S100a10  | 0,172713                             | -0,36741                             |
| Pcx      | 0,134581                             | -0,3683                              |
| Gc       | 0,131663                             | -0,46807                             |
| Slc51b   | 0,0979                               | -0,48568                             |
| Svopl    | 0,096573                             | -0,45588                             |
| Cdc42ep3 | -0,09602                             | 0,330925                             |
| Nrp2     | -0,10993                             | 0,351585                             |
| Igfbp3   | -0,1592                              | 0,351059                             |
| Slc14a2  | -0,17895                             | 0,430528                             |
| Prelp    | -0,18757                             | 0,427061                             |
| Wfdc16   | -0,25856                             | 0,532557                             |
| Tnfsf10  | -0,39561                             | 0,15205                              |
| Dio1     | -0,59044                             | 0,072754                             |

**Supplementary table S2.** Top 25 DEGs which IRR dependently change expression in mouse kidney under bicarbonate loading.
